# Supplementary material for: Cytomegalovirus vectors expressing Plasmodium knowlesi antigens induce immune responses that delay parasitemia upon sporozoite challenge
Source: PubMed Central journal article supplement (PMC6343944; doi:10.1371/journal.pone.0210252), 2019-01-23

### RhCMV/PK4 BAC

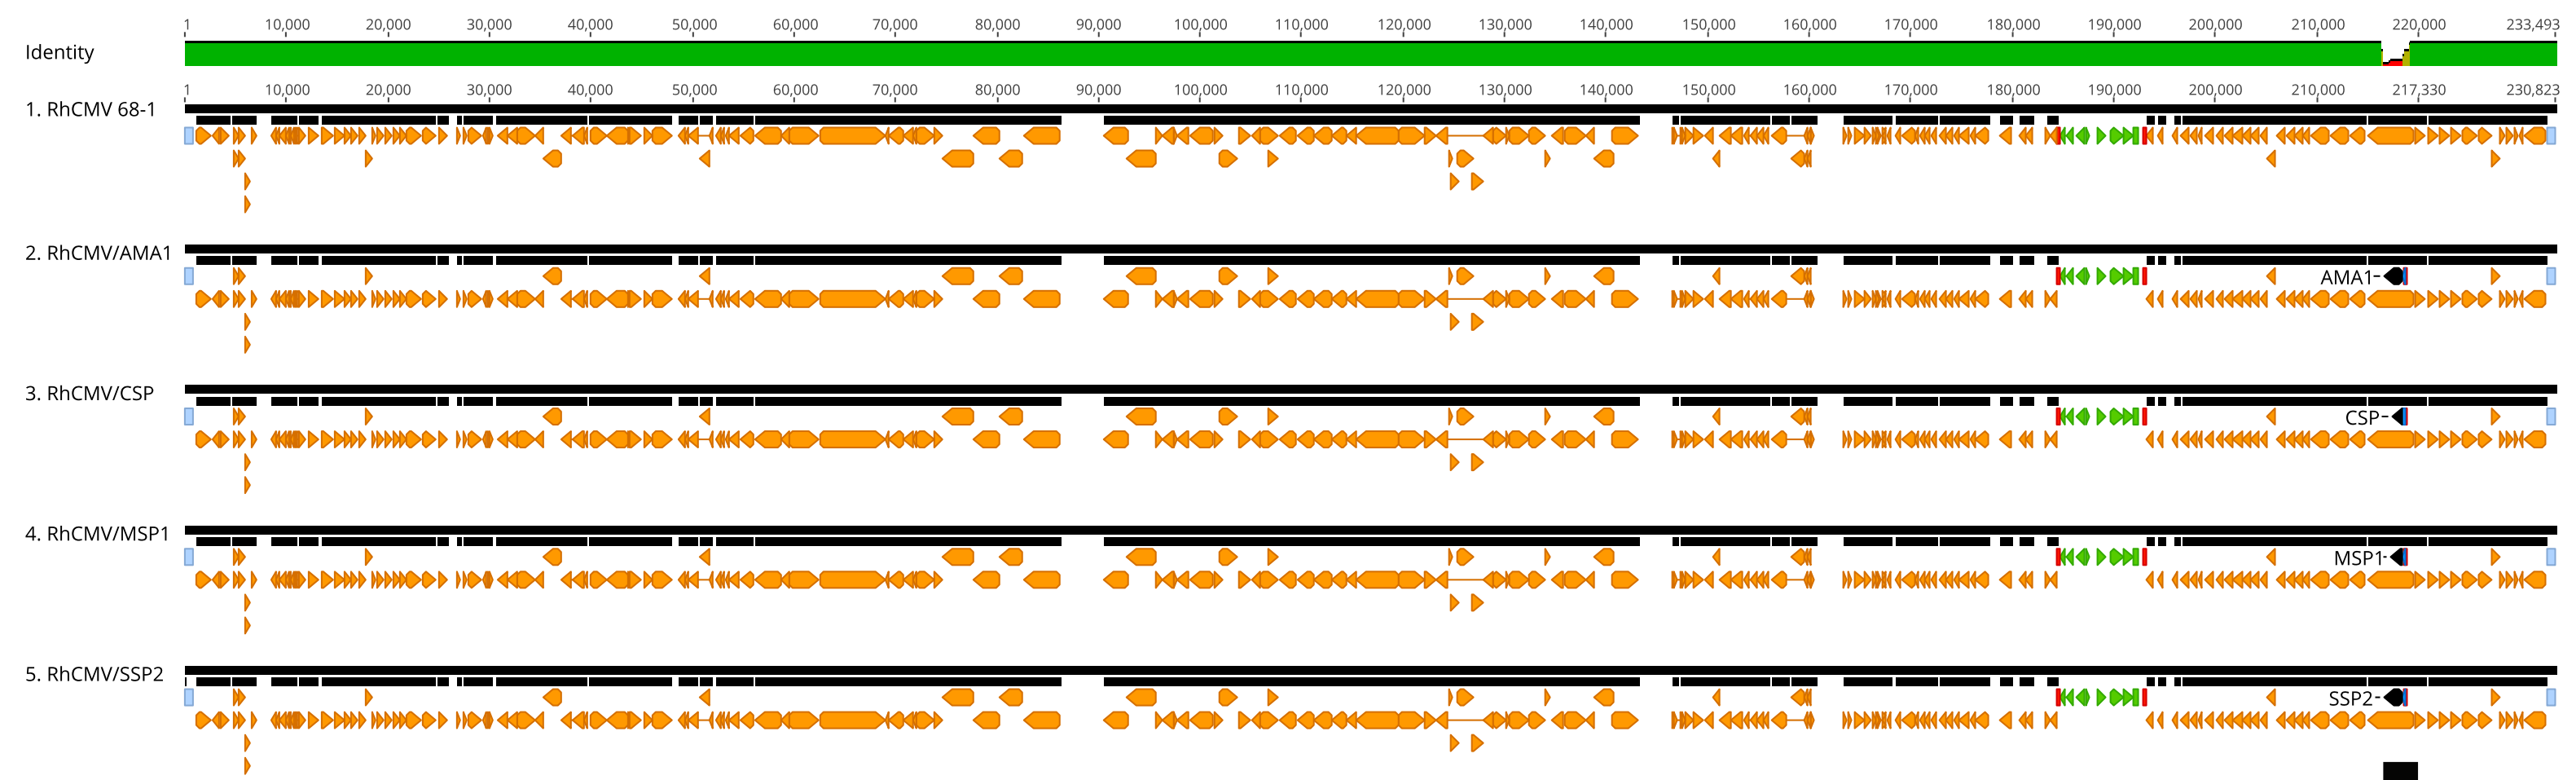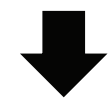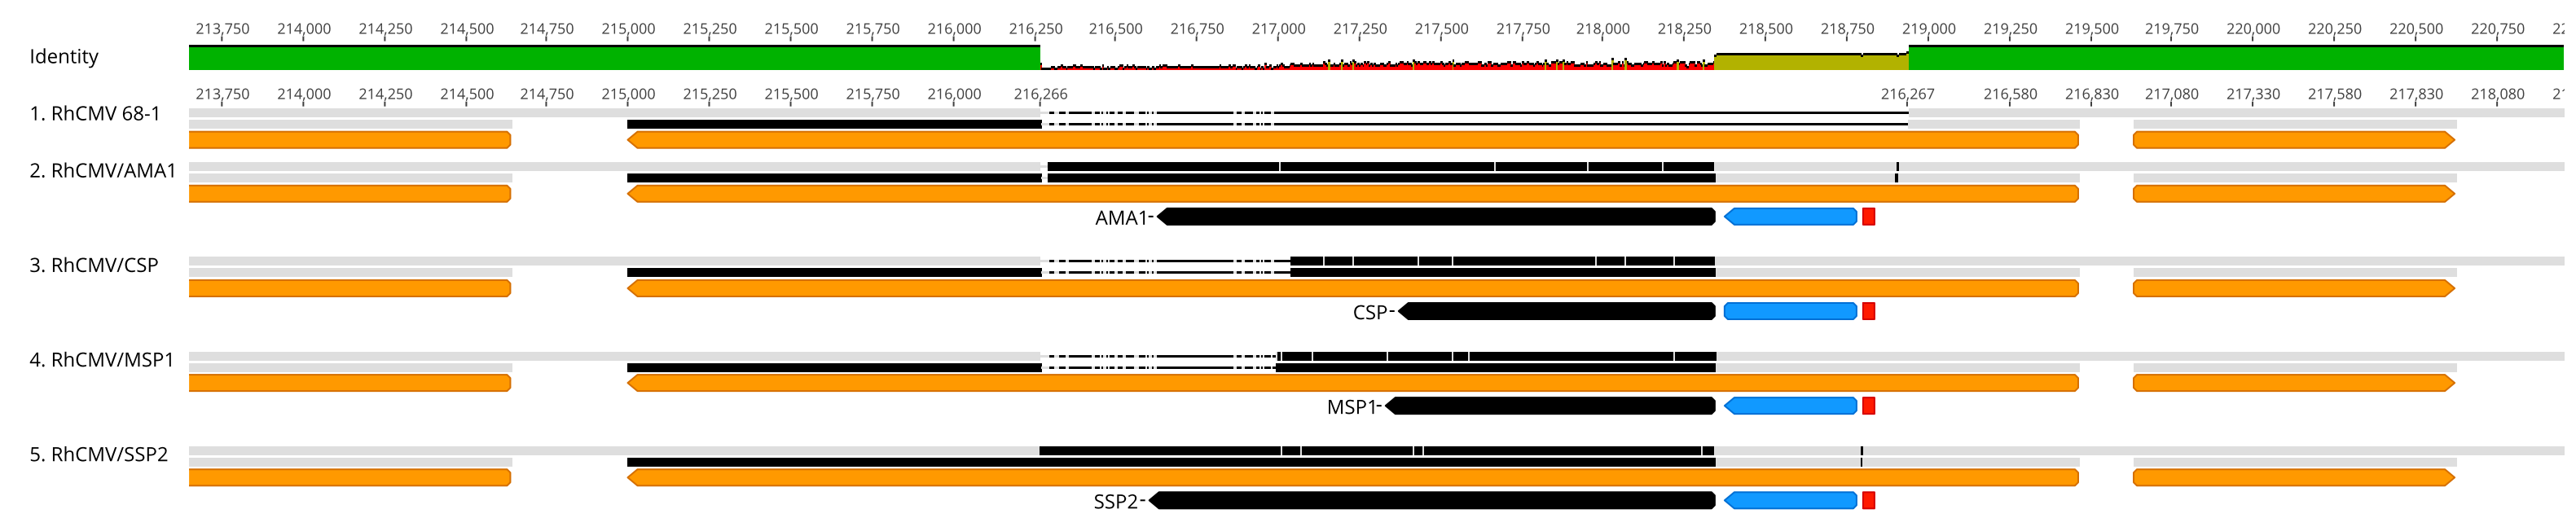

### RhCMVΔRh186-9/PK4 BAC

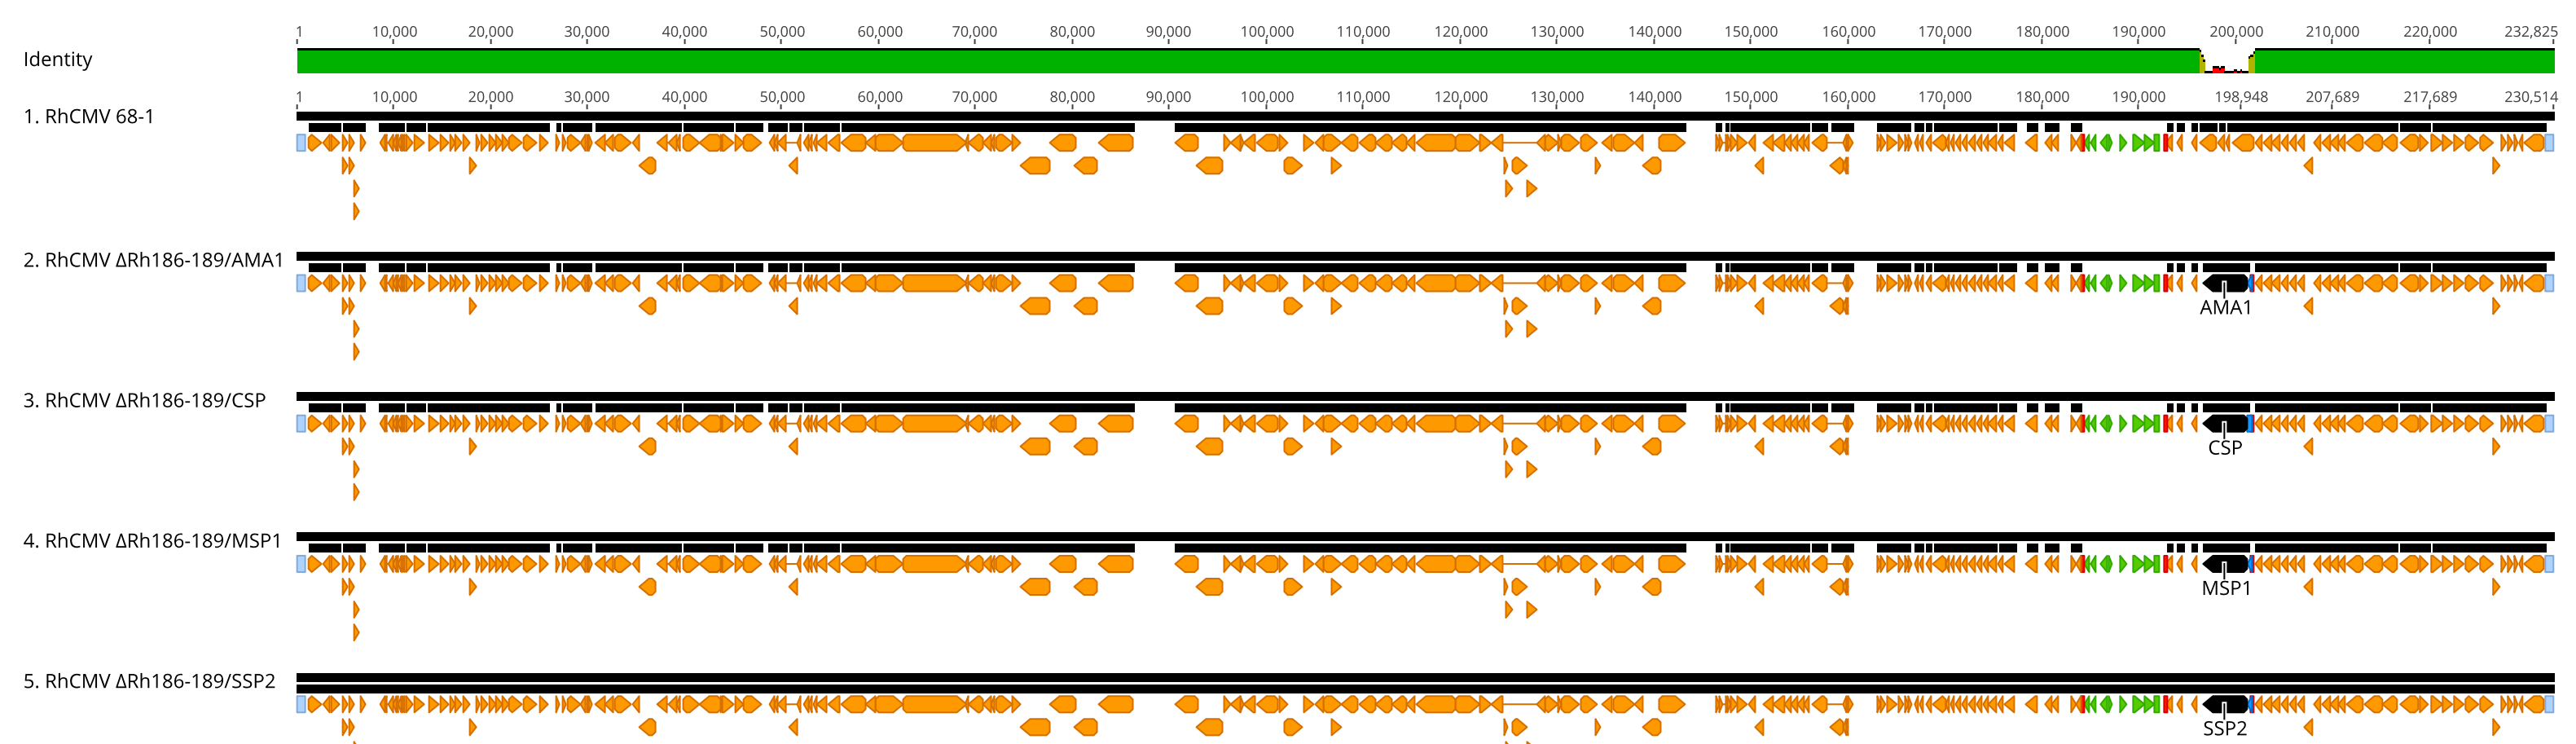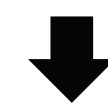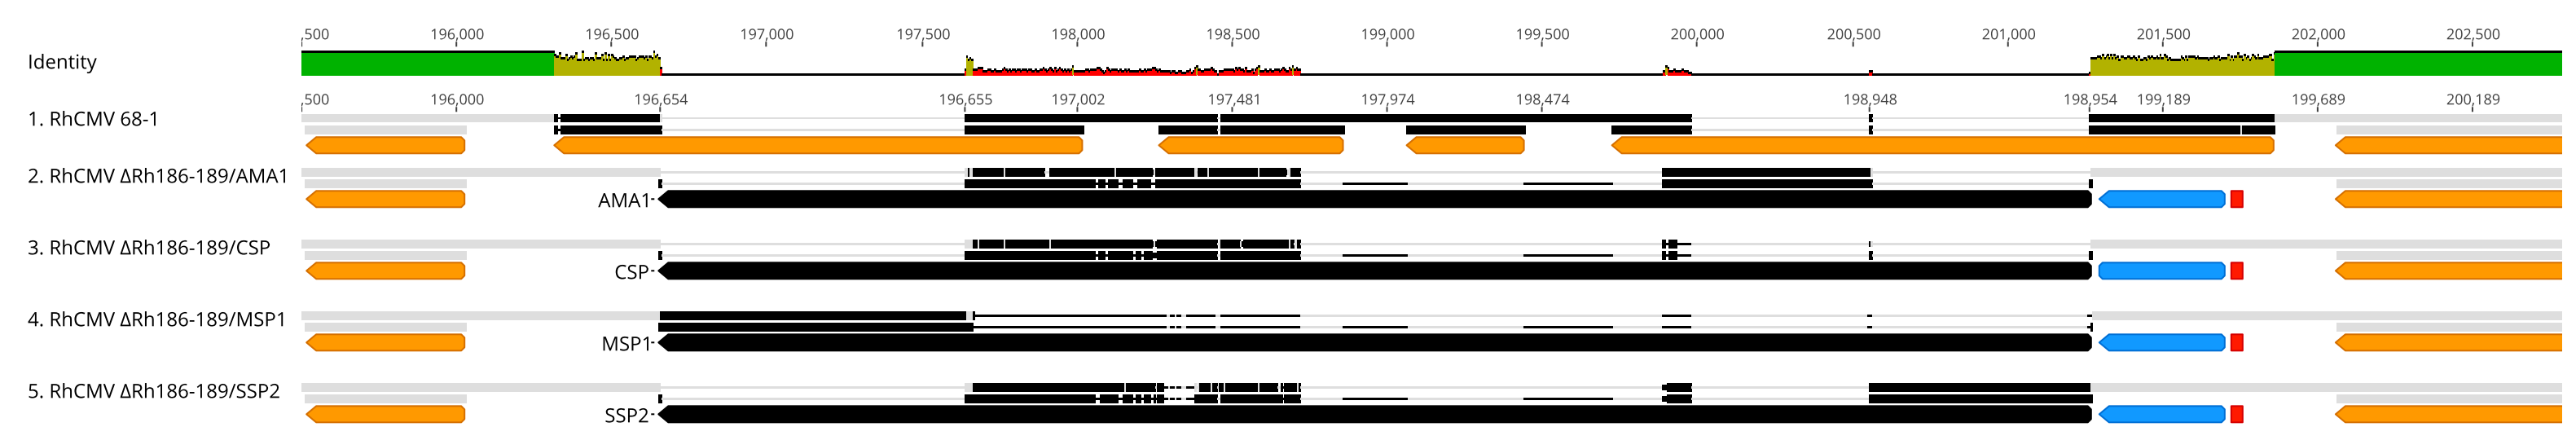

Supplement: pone.0210252.s001.pdf [file pone.0210252.s001.pdf]
