# Supplementary material for: Cytomegalovirus vectors expressing Plasmodium knowlesi antigens induce immune responses that delay parasitemia upon sporozoite challenge
Source: PubMed Central journal article supplement (PMC6343944; doi:10.1371/journal.pone.0210252), 2019-01-23
Supplement: pone.0210252.s002.pdf [file pone.0210252.s002.pdf]

ATGAAGAACTTCATCCTGCTGGCCGTGTCCTCTATCCTGCTGGTGGACCTGCTGCCACCCACTTCGAGGCACAACGTGGACCTGTCCAGGGCCATCAAC  
M K N F I L L A V S S I L L V D L L P T H F E H N V D L S R A I N  
ATGAAGAACTTCATCCTGCTGGCCGTGTCCTCTATCCTGCTGGTGGACCTGCTGCCACCCACTTCGAGGCACAACGTGGACCTGTCCAGGGCCATCAAC  
M K N F I L L A V S S I L L V D L L P T H F E H N V D L S R A I N  
100 GTGAACGGCGTGTCTTCAACAATGTGGACACCTCCAGCCTGGGAGCCGCCAGGTCCGCCAGTCCGCCTCTAGAGGAAGAGGCCTGGGCGAGAAGCCC  
V N G V S F N N V D T S S L G A A Q V R Q S A S R G R G L G E K P  
GTGAACGGCGTGTCTTCAACAATGTGGACACCTCCAGCCTGGGAGCCGCCAGGTCCGCCAGTCCGCCTCTAGAGGAAGAGGCCTGGGCGAGAAGCCC  
V N G V S F N N V D T S S L G A A Q V R Q S A S R G R G L G E K P  
200 AAAGAGGGGCGCCGACAAAGAGAAGAAGAAAGAGAAGGGTAAAGAGAAAGAGGAAGAACCACAAGAAGCCCAACGAGAACAAGCTGAAGCAGCCAAACGAG  
K E G A D K E K K K E K G K E K E E E P K K P N E N K L K Q P N E  
AAAGAGGGGCGCCGACAAAGAGAAGAAGAAAGAGAAGGGTAAAGAGAAAGAGGAAGAACCACAAGAAGCCCAACGAGAACAAGCTGAAGCAGCCAAACGAG  
K E G A D K E K K K E K G K E K E E E P K K P N E N K L K Q P N E  
300 GGCCAGCCCCAGGCTCAGGGCGACGGCGCTAATGCTGGACAGCCACAGGCCCAGGGGGATGGGGCCAACGCCGGACAGCCTCAGGCTCAGGGGGATGGC  
G Q P Q A Q G D G A N A G Q P Q A Q G D G A N A G Q P Q A Q G D G  
GGCCAGCCCCAGGCTCAGGGCGACGGCGCTAATGCTGGACAGCCACAGGCCCAGGGGGATGGGGCCAACGCCGGACAGCCTCAGGCTCAGGGGGATGGC  
G Q P Q A Q G D G A N A G Q P Q A Q G D G A N A G Q P Q A Q G D G  
400 GCCAATGCTGGCCAGCCACAGGCTCAGGGGGATGGCGCTAATGCCGGGCAGCCTCAGGCTCAGGGGCGACGGGGCTAACGCCGGCCAGCCACAGGCCCAG  
A N A G Q P Q A Q G D G A N A G Q P Q A Q G D G A N A G Q P Q A Q  
GCCAATGCTGGCCAGCCACAGGCTCAGGGGGATGGCGCTAATGCCGGGCAGCCTCAGGCTCAGGGGCGACGGGGCTAACGCCGGCCAGCCACAGGCCCAG  
A N A G Q P Q A Q G D G A N A G Q P Q A Q G D G A N A G Q P Q A Q  
500 GGCGACGGGGCCAATGCTGGGCAGCCCCAGGCCCAGGGCGACGGCGCCAATGCCGGCCAGCCTCAGGCCCAGGGGGATGGCGCTAACGCTGGACAGCCC  
G D G A N A G Q P Q A Q G D G A N A G Q P Q A Q G D G A N A G Q P  
GGCGACGGGGCCAATGCTGGGCAGCCCCAGGCCCAGGGCGACGGCGCCAATGCCGGCCAGCCTCAGGCCCAGGGGGATGGCGCTAACGCTGGACAGCCC  
G D G A N A G Q P Q A Q G D G A N A G Q P Q A Q G D G A N A G Q P  
600 CAGGCTCAGGGGGAC-----  
Q A Q G D -----  
CAGGCTCAGGGGGACGGGGCTAACGCTGGACAGCCACAGGCTCAGGGCGACGGCGCCAACGCCGGACAGCCCCAGGCCCAGGGCGATAGAGCTAACGCC  
Q A Q G D G A N A G Q P Q A Q G D G A N A G Q P Q A Q G D A R A N A  
700 -----  
-----GGGGTCAATGTGCCCAGGCAGGGAAGAAACGGCGGAGGCGCCCCAGCCGGCGGAAACGAGGGAAACAAGCAGGCC  
-----G V N V P R Q G R N G G G A P A G G N E G N K Q A  
GGGCAGCCACAGGCTCAGGGGGATGGGGCCAATGTGCCAGGCAGGGAAGAAACGGCGGAGGCGCCCCAGCCGGCGGAAACGAGGGAAACAAGCAGGCC  
G Q P Q A Q G D G A N V P R Q G R N G G G A P A G G N E G N K Q A  
800 GGCAAGGGGCCAGGGCCAGAACAACCAGGGGGCTAATGCCCCAAACGAGAAGGTGGTGAACGACTACCTGCACAAGATCAGGTCCTCCGTGACCACCGAG  
G K G Q G Q N N Q G A N A P N E K V V N D Y L H K I R S S V T T E  
GGCAAGGGGCCAGGGCCAGAACAACCAGGGGGCTAATGCCCCAAACGAGAAGGTGGTGAACGACTACCTGCACAAGATCAGGTCCTCCGTGACCACCGAG  
G K G Q G Q N N Q G A N A P N E K V V N D Y L H K I R S S V T T E  
900 TGGACCCCCTGCTCCGTGACCTGCGGCAATGGCGTGCGCATCAGAAGAAAGGCCACGCGGCAACAAGAAGGCCGAGGACCTGACCATGGACGACCTG  
W T P C S V T C G N G V R I R R K A H A G N K K A E D L T M D D L  
TGGACCCCCTGCTCCGTGACCTGCGGCAATGGCGTGCGCATCAGAAGAAAGGCCACGCGGCAACAAGAAGGCCGAGGACCTGACCATGGACGACCTG  
W T P C S V T C G N G V R I R R K A H A G N K K A E D L T M D D L  
1,000 GAAGTGGAAGCCTGCGTGATGGACAAGTGCGCCGGCATCTTCAACGTGGTGTCCAACCTCCCTGGGCGACTACAAGGACGACGACGACAAATGA  
E V E A C V M D K C A G I F N V V S N S L G D Y K D D D D K \*  
GAAGTGGAAGCCTGCGTGATGGACAAGTGCGCCGGCATCTTCAACGTGGTGTCCAACCTCCCTGGGCGACTACAAGGACGACGACGACAAATGA  
E V E A C V M D K C A G I F N V V S N S L G D Y K D D D D K \*
