# Supplementary material for: Cytomegalovirus vectors expressing Plasmodium knowlesi antigens induce immune responses that delay parasitemia upon sporozoite challenge
Source: PubMed Central journal article supplement (PMC6343944; doi:10.1371/journal.pone.0210252), 2019-01-23
Supplement: pone.0210252.s003.pdf [file pone.0210252.s003.pdf]

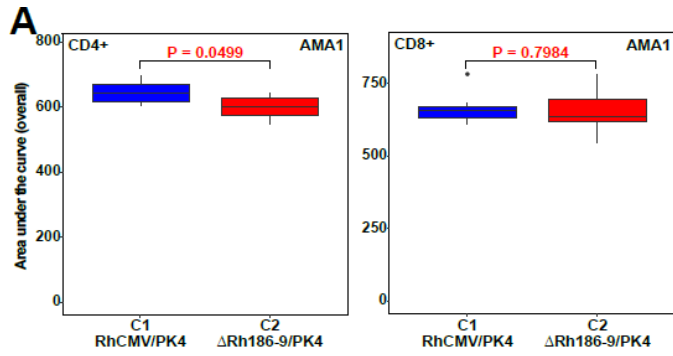

| P values Area under the curve (post-boost 2) |        |        |
|----------------------------------------------|--------|--------|
| Antigen                                      | CD4+   | CD8+   |
| AMA1                                         | 0.0280 | 1.0000 |
| CSP                                          | 0.0443 | 0.9380 |
| MSP1c                                        | 0.0443 | 1.0000 |
| SSP2                                         | 0.0443 | 1.0000 |

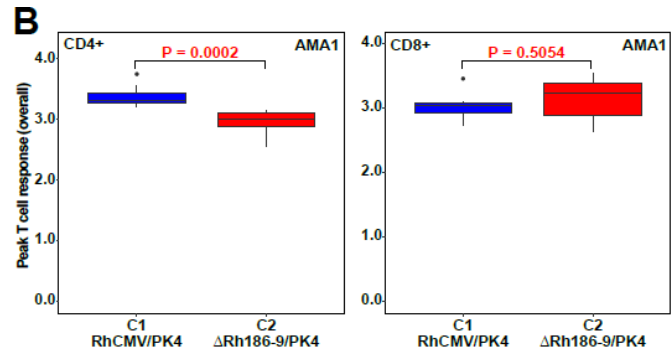

| P values Area under the curve (post-boost 2) |        |        |
|----------------------------------------------|--------|--------|
| Antigen                                      | CD4+   | CD8+   |
| AMA1                                         | 0.0037 | 1.0000 |
| CSP                                          | 0.0037 | 0.9380 |
| MSP1c                                        | 0.0037 | 1.0000 |
| SSP2                                         | 0.1304 | 1.0000 |

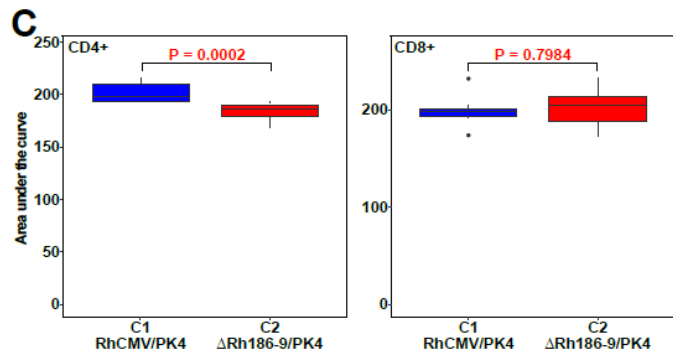

| P values Area under the curve (post-boost 2) |        |        |
|----------------------------------------------|--------|--------|
| Antigen                                      | CD4+   | CD8+   |
| AMA1                                         | 0.0012 | 0.9846 |
| CSP                                          | 0.0006 | 0.5215 |
| MSP1c                                        | 0.0009 | 1.0000 |
| SSP2                                         | 0.0104 | 1.0000 |

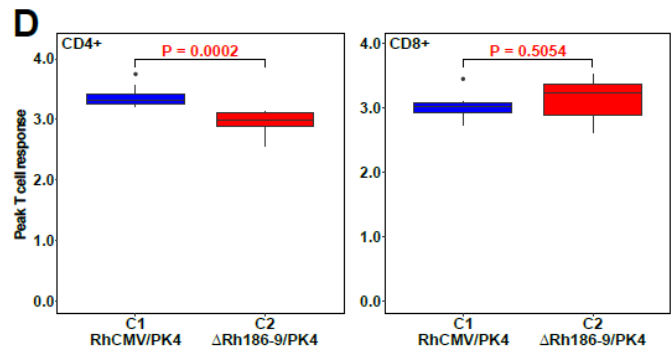

| P values Area under the curve (post-boost 2) |        |        |
|----------------------------------------------|--------|--------|
| Antigen                                      | CD4+   | CD8+   |
| AMA1                                         | 0.0037 | 1.0000 |
| CSP                                          | 0.0037 | 0.9380 |
| MSP1c                                        | 0.0037 | 1.0000 |
| SSP2                                         | 0.1304 | 1.0000 |
