# Supplementary material for: Cytomegalovirus vectors expressing Plasmodium knowlesi antigens induce immune responses that delay parasitemia upon sporozoite challenge
Source: PubMed Central journal article supplement (PMC6343944; doi:10.1371/journal.pone.0210252), 2019-01-23
Supplement: pone.0210252.s005.pdf [file pone.0210252.s005.pdf]

|                  | Animal ID | Day 6 | Day 7 | Day 8 | Day 9 | Day 10 | Day 11 | Day 12  | Day 13  |
|------------------|-----------|-------|-------|-------|-------|--------|--------|---------|---------|
| C1: RhCMV/PK4    | C1-1      | 0     | 0     | 0     | 0     | 4      | 59     | 670     | Treated |
|                  | C1-2      | 0     | 0     | 1     | 16    | 62     | 621    | Treated | Treated |
|                  | C1-3      | 0     | 0     | 0     | 1     | 32     | 243    | 2029    | Treated |
|                  | C1-4      | 0     | 0     | 0     | 1     | 4      | 38     | 1767    | Treated |
|                  | C1-5      | 0     | 0     | 0     | 3     | 23     | 250    | 1100    | Treated |
|                  | C1-6      | 0     | 0     | 0     | 5     | 25     | 204    | 3533    | Treated |
|                  | C1-7      | 0     | 0     | 0     | 3     | 19     | 107    | 2430    | Treated |
|                  | C1-8      | 0     | 0     | 0     | 5     | 77     | 1222   | Treated | Treated |
| C2: ΔRh186-9/PK4 | C2-1      | 0     | 0     | 0     | 3     | 36     | 260    | 564     | Treated |
|                  | C2-2      | 0     | 0     | 0     | 3     | 38     | 326    | 669     | Treated |
|                  | C2-3      | 0     | 0     | 0     | 13    | 48     | 761    | Treated | Treated |
|                  | C2-4      | 0     | 0     | 0     | 4     | 50     | 598    | Treated | Treated |
|                  | C2-5      | 0     | 0     | 0     | 0     | 9      | 87     | 1664    | Treated |
|                  | C2-6      | 0     | 0     | 0     | 7     | 43     | 941    | Treated | Treated |
|                  | C2-7      | 0     | 0     | 0     | 0     | 0      | 0      | 0       | 0       |
|                  | C2-8      | 0     | 0     | 0     | 6     | 50     | 314    | Treated | Treated |
| C3: Unvaccinated | C3-1      | 0     | 0     | 0     | 13    | 134    | 1457   | Treated | Treated |
|                  | C3-2      | 0     | 0     | 1     | 5     | 27     | 490    | Treated | Treated |
|                  | C3-3      | 0     | 0     | 1     | 20    | 133    | 2290   | Treated | Treated |
|                  | C3-4      | 0     | 0     | 1     | 11    | 95     | 1600   | Treated | Treated |
|                  | C3-5      | 0     | 0     | 1     | 16    | 263    | 2100   | Treated | Treated |
|                  | C3-6      | 0     | 0     | 1     | 5     | 29     | 256    | 1567    | Treated |
|                  | C3-7      | 0     | 0     | 0     | 8     | 19     | 244    | 4533    | Treated |
|                  | C3-8      | 0     | 0     | 0     | 11    | 158    | 1156   | Treated | Treated |
