# Supplementary material for: Cytomegalovirus vectors expressing Plasmodium knowlesi antigens induce immune responses that delay parasitemia upon sporozoite challenge
Source: PubMed Central journal article supplement (PMC6343944; doi:10.1371/journal.pone.0210252), 2019-01-23

## AMA1

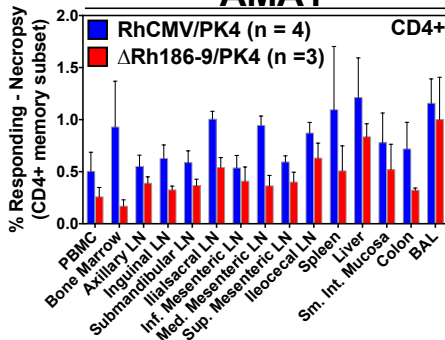

## CSP

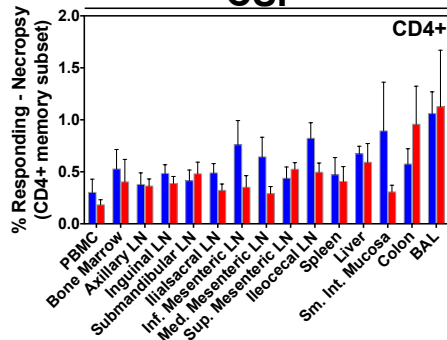

## AMA1

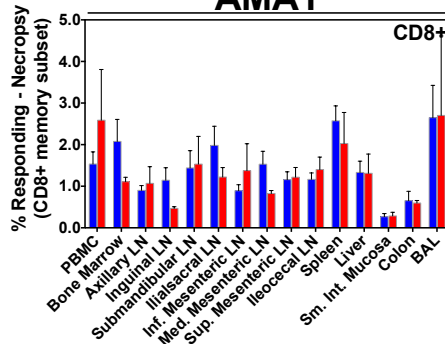

## CSP

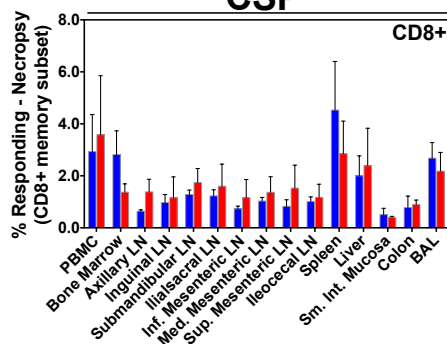

## MSP1c

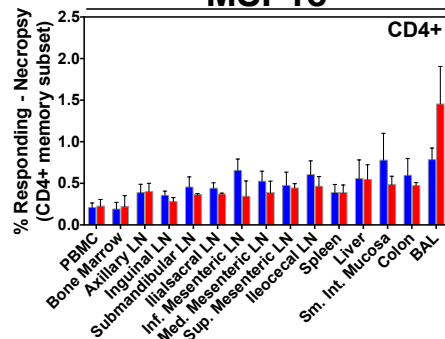

## SSP2

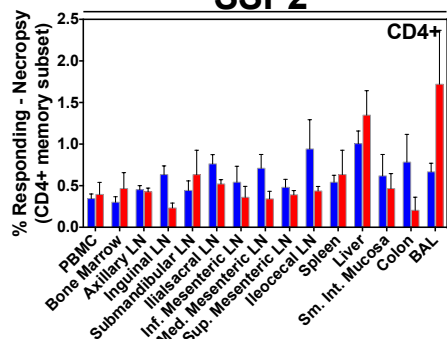

## MSP1c

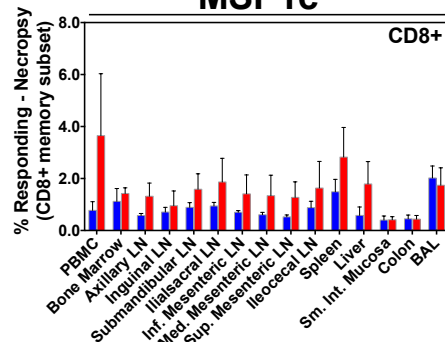

## SSP2

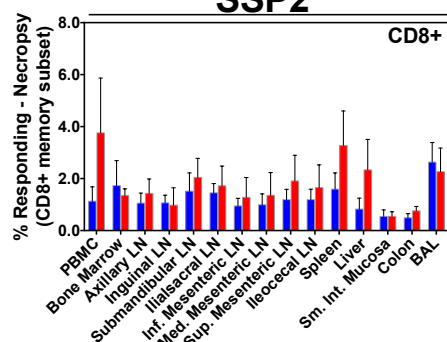

Supplement: pone.0210252.s006.pdf [file pone.0210252.s006.pdf]
